# Supplementary material for: Long-Term Remodeling Response in the Lamina Cribrosa Years after IOP Lowering by Suturelysis after Trabeculectomy
Source: bioRxiv or medRxiv preprint supplement (doi:10.1101/2023.05.30.23290730), 2023-06-03
Supplement: Supplementary file [file media-1.pdf]

## Supplemental Material

## S1 DVC Errors

Supplemental Table S1: Average Baseline Error

|       | Baseline $E_{rr}$<br>error | Baseline $E_{zz}$<br>error | Baseline<br>$E_{rz}$ error | Baseline<br>$E_{\theta\theta}$ error | Baseline<br>$E_{r\theta}$ error | Baseline<br>$E_{r\theta}$ error | Baseline $U_r$<br>error | Baseline $U_z$<br>error | Baseline $U_\theta$<br>error |
|-------|----------------------------|----------------------------|----------------------------|--------------------------------------|---------------------------------|---------------------------------|-------------------------|-------------------------|------------------------------|
| LC072 | 0.0023                     | 0.0023                     | 0.0021                     | 0.0019                               | -0.00010                        | -0.0046                         | 0.44                    | -0.90                   | 0.63                         |
| LC117 | -0.00043                   | 0.0011                     | -0.00019                   | -0.000015                            | -0.00046                        | -0.0055                         | -0.62                   | -0.72                   | -2.94                        |
| LC167 | 0.0012                     | 0.0027                     | 0.0014                     | -0.00037                             | 0.0033                          | -0.0053                         | -0.72                   | -0.70                   | -3.79                        |
| LC181 | 0.00091                    | 0.0067                     | 0.0028                     | -0.0043                              | -0.00048                        | -0.0091                         | -0.58                   | -2.07                   | 9.01                         |
| LC182 | 0.00014                    | 0.00083                    | 0.00020                    | 0.00083                              | 0.000056                        | 0.0056                          | -0.12                   | 0.20                    | 3.51                         |
| LC208 | -0.0012                    | -0.00035                   | 0.0012                     | -0.0027                              | 0.00025                         | -0.0033                         | 1.31                    | -0.096                  | 4.23                         |
| LC229 | 0.0018                     | 0.0010                     | 0.00033                    | 0.00082                              | 0.0039                          | -0.0096                         | 0.81                    | -0.018                  | -0.28                        |
| LC238 | 0.0000029                  | 0.00022                    | -0.00059                   | -0.00018                             | -0.00037                        | 0.00016                         | 0.26                    | -0.075                  | 0.17                         |
| LC260 | -0.000067                  | 0.00067                    | -0.0020                    | -0.0024                              | -0.0012                         | 0.000044                        | 0.72                    | -0.45                   | 4.20                         |
| LC296 | -0.00046                   | 0.0017                     | -0.00080                   | -0.00067                             | 0.00025                         | -0.0052                         | -0.59                   | 0.082                   | -0.065                       |
| LC297 | 0.00044                    | 0.0014                     | -0.00049                   | 0.0028                               | 0.00049                         | -0.0024                         | -0.26                   | 1.01                    | 0.21                         |
| LC322 | -0.00056                   | 0.0016                     | 0.0011                     | 0.0016                               | 0.00071                         | -0.0024                         | -0.22                   | -1.20                   | -1.26                        |
| LC323 | -0.00084                   | -0.0000070                 | 0.0014                     | 0.000091                             | -0.0025                         | 0.0014                          | 0.65                    | 0.021                   | -0.35                        |
| LC328 | -0.000042                  | 0.00030                    | 0.0012                     | -0.0015                              | 0.00027                         | 0.0019                          | 0.26                    | 0.29                    | -0.94                        |
| LC356 | -0.0013                    | 0.0013                     | -0.00041                   | -0.00046                             | 0.00090                         | 0.0042                          | 0.48                    | 0.20                    | 0.97                         |
| LC068 | 0.0015                     | -0.000033                  | -0.0013                    | -0.0021                              | -0.0017                         | -0.0043                         | 0.23                    | 0.24                    | 1.21                         |

Supplemental Table S2: Average correlation error

|       | Correlation<br>$E_{rr}$ error | Correlation<br>$E_{zz}$ error | Correlation<br>$E_{rz}$ error | Correlation<br>$E_{\theta\theta}$ error | Correlation<br>$E_{r\theta}$ error | Correlation<br>$E_{r\theta}$ error | Correlation<br>$U_r$ error | Correlation<br>$U_z$ error | Correlation<br>$U_\theta$ error |
|-------|-------------------------------|-------------------------------|-------------------------------|-----------------------------------------|------------------------------------|------------------------------------|----------------------------|----------------------------|---------------------------------|
| LC072 | -0.0013                       | 0.0040                        | -0.00052                      | 0.0028                                  | -0.000074                          | -0.00095                           | 0.012                      | 0.74                       | -0.35                           |
| LC117 | -0.00067                      | 0.0052                        | 0.00017                       | 0.0024                                  | 0.000082                           | -0.00052                           | -0.061                     | 0.62                       | 0.39                            |
| LC167 | -0.0014                       | 0.0037                        | -0.000095                     | 0.0028                                  | 0.00011                            | -0.00028                           | 0.052                      | 0.65                       | 0.27                            |
| LC181 | -0.00071                      | 0.0049                        | -0.000019                     | 0.0030                                  | 0.00043                            | 0.00071                            | -0.011                     | 0.65                       | -0.28                           |
| LC182 | -0.00012                      | 0.0055                        | -0.00033                      | 0.0035                                  | 0.000023                           | -0.00030                           | -0.0099                    | 0.67                       | 0.22                            |
| LC208 | -0.0021                       | 0.0091                        | 0.00015                       | 0.0040                                  | 0.00033                            | 0.00015                            | 0.068                      | 0.57                       | -0.067                          |
| LC229 | -0.00067                      | 0.0062                        | 0.00024                       | 0.0039                                  | 0.00013                            | 0.0014                             | -0.18                      | 0.32                       | -0.28                           |
| LC238 | -0.00062                      | 0.0043                        | -0.000069                     | 0.0031                                  | 0.000094                           | 0.000019                           | 0.051                      | 0.63                       | 0.14                            |
| LC260 | -0.0012                       | 0.0042                        | -0.000082                     | 0.0029                                  | 0.000068                           | 0.00039                            | -0.0037                    | 0.73                       | -0.12                           |
| LC296 | -0.00046                      | 0.0058                        | 0.00052                       | 0.0030                                  | 0.00012                            | 0.00038                            | -0.18                      | 0.47                       | -0.20                           |
| LC297 | -0.00067                      | 0.0052                        | 0.000012                      | 0.0028                                  | 0.0000066                          | -0.00040                           | -0.034                     | 0.68                       | 0.095                           |
| LC322 | -0.0030                       | 0.0051                        | -0.0000029                    | 0.0027                                  | -0.00060                           | 0.0013                             | -0.20                      | 0.54                       | 0.058                           |
| LC323 | -0.00077                      | 0.0055                        | 0.000060                      | 0.0026                                  | 0.0000079                          | 0.00062                            | 0.038                      | 0.73                       | -0.16                           |
| LC328 | -0.0025                       | 0.0054                        | 0.00030                       | 0.0026                                  | -0.000083                          | -0.00018                           | -0.070                     | 0.61                       | -0.15                           |
| LC356 | -0.0012                       | 0.0052                        | -0.000056                     | 0.0028                                  | 0.000097                           | -0.0025                            | 0.16                       | 0.76                       | 0.49                            |
| LC068 | -0.0015                       | 0.0055                        | -0.000047                     | 0.0023                                  | 0.0000011                          | -0.00021                           | -0.073                     | 0.52                       | -0.34                           |

Supplemental Table S3: The specimen-averaged baseline and correlation errors (n = 16, 15 patients)

|                    | Strain Outcomes |       | Baseline error |        |              | Correlation error |         |              |
|--------------------|-----------------|-------|----------------|--------|--------------|-------------------|---------|--------------|
|                    | Mean            | std   | mean           | std    | p-value      | mean              | std     | p-value      |
| $E_{zz}$           | 0.14            | 0.21  | 0.0013         | 0.0017 | <b>0.020</b> | 0.0053            | 0.0012  | <b>0.023</b> |
| $E_{rr}$           | 0.000099        | 0.014 | 0.00021        | 0.0011 | 0.97         | -0.0012           | 0.00079 | 0.72         |
| $E_{\theta\theta}$ | -0.0028         | 0.024 | -0.00042       | 0.0018 | 0.70         | 0.0029            | 0.00049 | 0.36         |
| $E_{r\theta}$      | 0.0048          | 0.013 | 0.00020        | 0.0016 | 0.17         | 0.000046          | 0.00022 | 0.16         |
| $E_{z\theta}$      | -0.0061         | 0.016 | -0.0024        | 0.0044 | 0.37         | -0.000023         | 0.00092 | 0.14         |
| $E_{rz}$           | 0.0050          | 0.026 | 0.00037        | 0.0013 | 0.50         | 0.000014          | 0.00024 | 0.45         |

**S2 LC depth change with strain**

Supplemental Table S4: Linear regression analysis comparing the follow-up anterior LC depth change to the follow-up strain. Also shown are  $p$ -values and associated  $R^2$  value (n = 15, 14 patients).

|                    | Strain at no |            | Change in  |                          | $R^2$  |
|--------------------|--------------|------------|------------|--------------------------|--------|
|                    | LC depth     |            | strain per | 1 $\mu\text{m}$ anterior |        |
|                    | change       | $p$ -value | change     | $p$ -value               |        |
| $E_{zz}$           | -0.032       | 0.58       | -0.0024    | <b>0.0044</b>            | 0.48   |
| $E_{rr}$           | 0.0015       | 0.79       | 0.000031   | 0.67                     | 0.015  |
| $E_{\theta\theta}$ | 0.0031       | 0.73       | 0.00014    | 0.23                     | 0.11   |
| $E_{r\theta}$      | 0.0053       | 0.30       | 0.000031   | 0.62                     | 0.019  |
| $E_{z\theta}$      | -0.011       | 0.056      | -0.00011   | 0.11                     | 0.18   |
| $E_{rz}$           | 0.00024      | 0.98       | -0.000028  | 0.82                     | 0.0042 |
| $E_{max}$          | 0.0099       | 0.85       | -0.0023    | <b>0.0028</b>            | 0.51   |
| $\Gamma_{max}$     | 0.025        | 0.31       | -0.0011    | <b>0.0019</b>            | 0.54   |

**S3 LC after-lysis and IOP change**

Supplemental Table S5: Linear regression analysis comparing the IOP decrease from before to 20 minutes after suturelysis to the follow-up strain. Also shown are  $p$ -values and associated  $R^2$  value (Strain  $n = 16$ , 15 patients, LC Depth  $n = 15$ , 14 patients).

|                    | Strain at 0 |            | Change in strain per 1mmHg IOP |              | $R^2$   |
|--------------------|-------------|------------|--------------------------------|--------------|---------|
|                    | IOP         | $p$ -value | decrease                       | $p$ -value   |         |
| <i>LC Depth</i>    | -94.81      | 0.00035    | 2.50                           | <b>0.046</b> | 0.27    |
| $E_{zz}$           | 0.23        | 0.018      | -0.0063                        | 0.22         | 0.11    |
| $E_{rr}$           | -0.0018     | 0.76       | 0.00014                        | 0.68         | 0.013   |
| $E_{\theta\theta}$ | -0.0035     | 0.74       | 0.000053                       | 0.93         | 0.00057 |
| $E_{r\theta}$      | 0.0076      | 0.17       | -0.00021                       | 0.51         | 0.031   |
| $E_{z\theta}$      | -0.0037     | 0.58       | -0.00018                       | 0.64         | 0.016   |
| $E_{rz}$           | 0.012       | 0.30       | -0.00048                       | 0.45         | 0.042   |
| $E_{max}$          | 0.25        | 0.0076     | -0.0055                        | 0.26         | 0.090   |
| $\Gamma_{max}$     | 0.14        | 0.0030     | -0.0024                        | 0.30         | 0.077   |

Supplemental Table S6: Linear regression analysis comparing the IOP decrease from before trabeculectomy to after-lysis to the follow-up strain. Also shown are  $p$ -values and associated  $R^2$  value (Strain  $n = 16$ , 15 patients, LC Depth  $n = 15$ , 14 patients).

|                    | Strain at 0 |            | Change in strain per 1mmHg IOP decrease |            | $R^2$  |
|--------------------|-------------|------------|-----------------------------------------|------------|--------|
|                    | IOP         | $p$ -value | $p$ -value                              | $p$ -value |        |
| <i>LC Depth</i>    | -65.71      | 0.0029     | 0.691                                   | 0.66       | 0.016  |
| $E_{zz}$           | 0.16        | 0.040      | -0.0022                                 | 0.72       | 0.0095 |
| $E_{rr}$           | -0.0044     | 0.29       | 0.00064                                 | 0.084      | 0.20   |
| $E_{\theta\theta}$ | -0.011      | 0.13       | 0.0012                                  | 0.060      | 0.23   |
| $E_{r\theta}$      | 0.0021      | 0.61       | 0.00038                                 | 0.28       | 0.082  |
| $E_{z\theta}$      | -0.0092     | 0.080      | 0.00044                                 | 0.31       | 0.072  |
| $E_{rz}$           | 0.0068      | 0.43       | -0.00026                                | 0.73       | 0.0088 |
| $E_{max}$          | 0.19        | 0.010      | -0.0022                                 | 0.70       | 0.011  |
| $\Gamma_{max}$     | 0.12        | 0.0021     | -0.0015                                 | 0.60       | 0.021  |

Supplemental Table S7: Linear regression analysis comparing the IOP decrease from after-lysis to follow-up to the follow-up strain. Also shown are  $p$ -values and associated  $R^2$  value (Strain n = 16, 15 patients, LC Depth n = 15, 14 patients).

|                    | Strain at 0 |            | Change in strain per 1mmHg IOP decrease |            | $R^2$  |
|--------------------|-------------|------------|-----------------------------------------|------------|--------|
|                    | IOP         | $p$ -value | $p$ -value                              | $p$ -value |        |
| <i>LC Depth</i>    | -49.49      | 0.0054     | -2.85                                   | 0.11       | 0.18   |
| $E_{zz}$           | 0.092       | 0.13       | 0.012                                   | 0.096      | 0.19   |
| $E_{rr}$           | 0.0030      | 0.44       | -0.00069                                | 0.13       | 0.16   |
| $E_{\theta\theta}$ | 0.00059     | 0.93       | -0.00082                                | 0.32       | 0.070  |
| $E_{r\theta}$      | 0.0045      | 0.26       | 0.000078                                | 0.86       | 0.0023 |
| $E_{z\theta}$      | -0.0052     | 0.27       | -0.00023                                | 0.67       | 0.013  |
| $E_{rz}$           | 0.00010     | 0.99       | 0.0012                                  | 0.17       | 0.13   |
| $E_{max}$          | 0.13        | 0.028      | 0.011                                   | 0.11       | 0.17   |
| $\Gamma_{max}$     | 0.086       | 0.0052     | 0.0053                                  | 0.099      | 0.18   |

Supplemental Table S8: Linear regression analysis comparing the years between after-lysis and follow-up to the follow-up strain. Also shown are  $p$ -values and associated  $R^2$  value (Strain n = 16, 15 patients, LC Depth n = 15, 14 patients).

|                    | Strain at 0 |            | Change in strain per |            | $R^2$  |
|--------------------|-------------|------------|----------------------|------------|--------|
|                    | years       | $p$ -value | 1 year               | $p$ -value |        |
| <i>LC Depth</i>    | -103.07     | 0.012      | 22.13                | 0.21       | 0.12   |
| $E_{zz}$           | 0.094       | 0.48       | 0.023                | 0.70       | 0.011  |
| $E_{rr}$           | 0.0011      | 0.90       | -0.00050             | 0.90       | 0.0013 |
| $E_{\theta\theta}$ | -0.025      | 0.081      | 0.011                | 0.086      | 0.20   |
| $E_{r\theta}$      | -0.0033     | 0.67       | 0.0040               | 0.26       | 0.090  |
| $E_{z\theta}$      | 0.0094      | 0.28       | -0.0076              | 0.061      | 0.23   |
| $E_{rz}$           | -0.00040    | 0.98       | 0.0027               | 0.71       | 0.0099 |
| $E_{max}$          | 0.12        | 0.35       | 0.028                | 0.62       | 0.018  |
| $\Gamma_{max}$     | 0.073       | 0.24       | 0.017                | 0.53       | 0.028  |

Supplemental Table S9: Linear regression analysis comparing the mean IOP recorded between after-lysis to follow-up to the follow-up strain. Also shown are  $p$ -values and associated  $R^2$  value (Strain n = 16, 15 patients, LC Depth n = 15, 14 patients).

|                    | Strain at 0 |            | Change in strain per |            | $R^2$  |
|--------------------|-------------|------------|----------------------|------------|--------|
|                    | IOP         | $p$ -value | 1mmHg IOP            | $p$ -value |        |
| <i>LC Depth</i>    | -110.42     | 0.020      | 4.37                 | 0.23       | 0.11   |
| $E_{zz}$           | 0.30        | 0.069      | -0.015               | 0.28       | 0.082  |
| $E_{rr}$           | -0.0016     | 0.88       | 0.00016              | 0.86       | 0.0022 |
| $E_{\theta\theta}$ | -0.015      | 0.42       | 0.0011               | 0.48       | 0.036  |
| $E_{r\theta}$      | -0.0051     | 0.59       | 0.00090              | 0.27       | 0.085  |
| $E_{z\theta}$      | -0.00037    | 0.97       | -0.00052             | 0.60       | 0.020  |
| $E_{rz}$           | 0.021       | 0.30       | -0.0014              | 0.40       | 0.051  |
| $E_{max}$          | 0.31        | 0.051      | -0.012               | 0.34       | 0.066  |
| $\Gamma_{max}$     | 0.16        | 0.037      | -0.0052              | 0.41       | 0.050  |



Supplemental Table S10: Linear regression analysis comparing the maximum IOP recorded between after-lysis to follow-up to the follow-up strain. Also shown are  $p$ -values and associated  $R^2$  value (Strain  $n = 16$ , 15 patients, LC Depth  $n = 15$ , 14 patients).

|                    | Strain at 0 |            | Change in strain per |            | $R^2$   |
|--------------------|-------------|------------|----------------------|------------|---------|
|                    | IOP         | $p$ -value | 1mmHg IOP            | $p$ -value |         |
| <i>LC Depth</i>    | -74.43      | 0.037      | 0.65                 | 0.64       | 0.017   |
| $E_{zz}$           | 0.19        | 0.15       | -0.0022              | 0.68       | 0.012   |
| $E_{rr}$           | 0.00067     | 0.93       | -0.000028            | 0.94       | 0.00048 |
| $E_{\theta\theta}$ | -0.014      | 0.31       | 0.00056              | 0.36       | 0.060   |
| $E_{r\theta}$      | -0.0069     | 0.30       | 0.00058              | 0.060      | 0.23    |
| $E_{z\theta}$      | 0.0018      | 0.84       | -0.00039             | 0.32       | 0.071   |
| $E_{rz}$           | -0.0066     | 0.65       | 0.00057              | 0.38       | 0.055   |
| $E_{max}$          | 0.22        | 0.081      | -0.0019              | 0.71       | 0.0099  |
| $\Gamma_{max}$     | 0.12        | 0.043      | -0.00076             | 0.76       | 0.0070  |

Supplemental Table S11: Linear regression analysis comparing the minimum IOP recorded between after-lysis to follow-up to the follow-up strain. Also shown are  $p$ -values and associated  $R^2$  value (Strain  $n = 16$ , 15 patients, LC Depth  $n = 15$ , 14 patients).

|                    | Strain at 0 |            | Change in strain per |            | $R^2$  |
|--------------------|-------------|------------|----------------------|------------|--------|
|                    | IOP         | $p$ -value | 1mmHg IOP            | $p$ -value |        |
| <i>LC Depth</i>    | -86.95      | 0.0070     | 4.40                 | 0.28       | 0.087  |
| $E_{zz}$           | 0.22        | 0.048      | -0.014               | 0.38       | 0.056  |
| $E_{rr}$           | -0.0037     | 0.58       | 0.00067              | 0.51       | 0.032  |
| $E_{\theta\theta}$ | -0.0075     | 0.54       | 0.00083              | 0.64       | 0.016  |
| $E_{r\theta}$      | 0.0016      | 0.79       | 0.00055              | 0.56       | 0.025  |
| $E_{z\theta}$      | -0.0070     | 0.37       | 0.00015              | 0.89       | 0.0013 |
| $E_{rz}$           | 0.020       | 0.11       | -0.0027              | 0.15       | 0.14   |
| $E_{max}$          | 0.25        | 0.021      | -0.013               | 0.39       | 0.053  |
| $\Gamma_{max}$     | 0.14        | 0.0082     | -0.0061              | 0.39       | 0.054  |

Supplemental Table S12: Linear regression analysis comparing the range of IOPs recorded between after-lysis to follow-up to the follow-up strain. Also shown are  $p$ -values and associated  $R^2$  value (Strain n = 16, 15 patients, LC Depth n = 15, 14 patients).

|                    | Strain at 0 |            | Change in strain per |            | $R^2$    |
|--------------------|-------------|------------|----------------------|------------|----------|
|                    | IOP         | $p$ -value | 1mmHg IOP            | $p$ -value |          |
| <i>LC Depth</i>    | -63.01      | 0.023      | 0.14                 | 0.91       | 0.00092  |
| $E_{zz}$           | 0.15        | 0.13       | -0.00056             | 0.91       | 0.00085  |
| $E_{rr}$           | 0.0015      | 0.80       | -0.000099            | 0.77       | 0.0064   |
| $E_{\theta\theta}$ | -0.0090     | 0.40       | 0.00043              | 0.47       | 0.038    |
| $E_{r\theta}$      | -0.0021     | 0.68       | 0.00047              | 0.12       | 0.17     |
| $E_{z\theta}$      | -0.00061    | 0.93       | -0.00038             | 0.31       | 0.072    |
| $E_{rz}$           | -0.0070     | 0.52       | 0.00082              | 0.18       | 0.12     |
| $E_{max}$          | 0.18        | 0.058      | -0.00036             | 0.94       | 0.00040  |
| $\Gamma_{max}$     | 0.11        | 0.024      | -0.000035            | 0.99       | 0.000016 |

Supplemental Table S13: Linear regression analysis comparing the standard deviation of IOPs recorded between after-lysis to follow-up to the follow-up strain. Also shown are  $p$ -values and associated  $R^2$  value (Strain n = 16, 15 patients, LC Depth n = 15, 14 patients).

|                    | Strain at 0 |            | Change in strain per |            | $R^2$  |
|--------------------|-------------|------------|----------------------|------------|--------|
|                    | IOP         | $p$ -value | 1mmHg IOP            | $p$ -value |        |
| <i>LC Depth</i>    | -68.20      | 0.020      | 1.55                 | 0.74       | 0.0090 |
| $E_{zz}$           | 0.18        | 0.092      | -0.0077              | 0.67       | 0.014  |
| $E_{rr}$           | 0.0013      | 0.83       | -0.00027             | 0.81       | 0.0041 |
| $E_{\theta\theta}$ | -0.0072     | 0.53       | 0.00096              | 0.64       | 0.017  |
| $E_{r\theta}$      | -0.00040    | 0.94       | 0.0011               | 0.28       | 0.081  |
| $E_{z\theta}$      | -0.00069    | 0.92       | -0.0012              | 0.36       | 0.061  |
| $E_{rz}$           | -0.0057     | 0.63       | 0.0023               | 0.28       | 0.084  |
| $E_{max}$          | 0.21        | 0.038      | -0.0073              | 0.67       | 0.014  |
| $\Gamma_{max}$     | 0.12        | 0.015      | -0.0033              | 0.68       | 0.012  |

Supplemental Table S14: Linear regression analysis comparing the variance of IOPs recorded between after-lysis to follow-up to the follow-up strain. Also shown are  $p$ -values and associated  $R^2$  value (Strain n = 16, 15 patients, LC Depth n = 15, 14 patients).

|                    | Strain at 0 |            | Change in strain per |            | $R^2$   |
|--------------------|-------------|------------|----------------------|------------|---------|
|                    | IOP         | $p$ -value | 1mmHg IOP            | $p$ -value |         |
| <i>LC Depth</i>    | -61.76      | 0.0051     | 0.031                | 0.94       | 0.00049 |
| $E_{zz}$           | 0.14        | 0.053      | -0.00016             | 0.91       | 0.00089 |
| $E_{rr}$           | 0.0010      | 0.82       | -0.000034            | 0.73       | 0.0088  |
| $E_{\theta\theta}$ | -0.0054     | 0.50       | 0.000094             | 0.58       | 0.022   |
| $E_{r\theta}$      | 0.0013      | 0.74       | 0.00013              | 0.15       | 0.14    |
| $E_{z\theta}$      | -0.0040     | 0.43       | -0.000076            | 0.49       | 0.035   |
| $E_{rz}$           | -0.00069    | 0.93       | 0.00021              | 0.25       | 0.093   |
| $E_{max}$          | 0.18        | 0.014      | -0.00018             | 0.90       | 0.0012  |
| $\Gamma_{max}$     | 0.11        | 0.0036     | -0.000082            | 0.91       | 0.0010  |

**S4 LC after-lysis and glaucomatous neuropathy**

Supplemental Table S15: Linear regression analysis comparing the RNFL thickness measured at suturelysis to the follow-up strain. Also shown are  $p$ -values and associated  $R^2$  value (Strain n = 16, 15 patients, LC Depth n = 15, 14 patients).

|                                              | Strain at 0 $\mu$ m |            | Change in strain per |              | $R^2$   |
|----------------------------------------------|---------------------|------------|----------------------|--------------|---------|
|                                              | RNFL                | $p$ -value | 1 $\mu$ m RNFL       | $p$ -value   |         |
| <i>LC Depth</i>                              | -234.78             | 0.018      | 2.77                 | 0.063        | 0.24    |
| <i>E<sub>zz</sub></i>                        | 0.84                | 0.026      | -0.011               | <b>0.054</b> | 0.24    |
| <i>E<sub>rr</sub></i>                        | 0.017               | 0.50       | -0.00027             | 0.50         | 0.033   |
| <i>E<sub><math>\theta\theta</math></sub></i> | 0.0015              | 0.97       | -0.000068            | 0.92         | 0.00067 |
| <i>E<sub>r<math>\theta</math></sub></i>      | 0.012               | 0.62       | -0.00011             | 0.77         | 0.0063  |
| <i>E<sub>z<math>\theta</math></sub></i>      | 0.019               | 0.49       | -0.00041             | 0.36         | 0.060   |
| <i>E<sub>rz</sub></i>                        | 0.064               | 0.17       | -0.00095             | 0.20         | 0.12    |
| <i>E<sub>max</sub></i>                       | 0.81                | 0.026      | -0.010               | 0.070        | 0.22    |
| <i><math>\Gamma_{max}</math></i>             | 0.38                | 0.032      | -0.0044              | 0.11         | 0.17    |

Supplemental Table S16: Linear regression analysis comparing the MD measured at suturelysis to the follow-up strain. Also shown are  $p$ -values and associated  $R^2$  value (Strain n = 16, 15 patients, LC Depth n = 15, 14 patients).

|                    | Strain at 0dB |            | Change in strain per |            | $R^2$   |
|--------------------|---------------|------------|----------------------|------------|---------|
|                    | MD            | $p$ -value | 1dB MD               | $p$ -value |         |
| <i>LC Depth</i>    | -82.44        | 0.011      | -2.00                | 0.38       | 0.059   |
| $E_{zz}$           | 0.19          | 0.080      | 0.0049               | 0.56       | 0.024   |
| $E_{rr}$           | -0.0014       | 0.84       | -0.00014             | 0.80       | 0.0050  |
| $E_{\theta\theta}$ | -0.00086      | 0.94       | 0.00019              | 0.85       | 0.0027  |
| $E_{r\theta}$      | 0.0032        | 0.61       | -0.00015             | 0.77       | 0.0065  |
| $E_{z\theta}$      | -0.0061       | 0.42       | 0.000000033          | 1.00       | <0.0001 |
| $E_{rz}$           | 0.010         | 0.43       | 0.00050              | 0.63       | 0.017   |
| $E_{max}$          | 0.24          | 0.024      | 0.0062               | 0.44       | 0.043   |
| $\Gamma_{max}$     | 0.15          | 0.0057     | 0.0038               | 0.32       | 0.071   |

Supplemental Table S17: Linear regression analysis comparing the VFI measured at suturelysis to the follow-up strain. Also shown are  $p$ -values and associated  $R^2$  value (Strain n = 16, 15 patients, LC Depth n = 15, 14 patients).

|                    | Strain at 0% |            | Change in strain per 1% |            | $R^2$   |
|--------------------|--------------|------------|-------------------------|------------|---------|
|                    | VFI          | $p$ -value | VFI                     | $p$ -value |         |
| <i>LC Depth</i>    | -13.52       | 0.80       | -0.67                   | 0.31       | 0.078   |
| $E_{zz}$           | 0.021        | 0.91       | 0.0016                  | 0.52       | 0.031   |
| $E_{rr}$           | 0.0028       | 0.82       | -0.000038               | 0.82       | 0.0039  |
| $E_{\theta\theta}$ | -0.0013      | 0.95       | -0.000020               | 0.94       | 0.00036 |
| $E_{r\theta}$      | 0.0063       | 0.59       | -0.000021               | 0.89       | 0.0014  |
| $E_{z\theta}$      | -0.0056      | 0.69       | -0.0000070              | 0.97       | 0.00010 |
| $E_{rz}$           | -0.0046      | 0.85       | 0.00013                 | 0.67       | 0.013   |
| $E_{max}$          | 0.034        | 0.85       | 0.0020                  | 0.41       | 0.049   |
| $\Gamma_{max}$     | 0.022        | 0.79       | 0.0012                  | 0.30       | 0.075   |



Supplemental Table S18: Linear regression analysis comparing the MD change from suturelysis to follow-up to the follow-up strain. Also shown are  $p$ -values and associated  $R^2$  value (Strain n = 16, 15 patients, LC Depth n = 15, 14 patients).

|                    | Strain at 0dB |            | Change in strain per |              | $R^2$   |
|--------------------|---------------|------------|----------------------|--------------|---------|
|                    | MD            | $p$ -value | 1dB MD               | $p$ -value   |         |
| <i>LC Depth</i>    | -61.07        | 0.0014     | -0.19                | 0.96         | 0.00021 |
| $E_{zz}$           | 0.14          | 0.033      | -0.0041              | 0.78         | 0.0060  |
| $E_{rr}$           | -0.00045      | 0.90       | -0.00049             | 0.60         | 0.020   |
| $E_{\theta\theta}$ | -0.0066       | 0.25       | -0.0034              | <b>0.024</b> | 0.31    |
| $E_{r\theta}$      | 0.0029        | 0.34       | -0.0017              | <b>0.033</b> | 0.28    |
| $E_{z\theta}$      | -0.0060       | 0.17       | 0.000078             | 0.94         | 0.00040 |
| $E_{rz}$           | 0.0018        | 0.78       | -0.0029              | 0.084        | 0.20    |
| $E_{max}$          | 0.17          | 0.0065     | -0.0031              | 0.82         | 0.0038  |
| $\Gamma_{max}$     | 0.11          | 0.0012     | -0.00082             | 0.90         | 0.0011  |

Supplemental Table S19: Linear regression analysis comparing the VFI change from suturelysis to follow-up to the follow-up strain. Also shown are  $p$ -values and associated  $R^2$  value (Strain n = 16, 15 patients, LC Depth n = 15, 14 patients).

|                    | Strain at 0% |            | Change in strain per 1% |              | $R^2$   |
|--------------------|--------------|------------|-------------------------|--------------|---------|
|                    | VFI          | $p$ -value | VFI                     | $p$ -value   |         |
| <i>LC Depth</i>    | -61.11       | 0.0014     | -0.0698                 | 0.95         | 0.00029 |
| $E_{zz}$           | 0.14         | 0.027      | 0.00036                 | 0.94         | 0.00046 |
| $E_{rr}$           | -0.00077     | 0.83       | -0.00026                | 0.37         | 0.058   |
| $E_{\theta\theta}$ | -0.0064      | 0.25       | -0.0011                 | <b>0.020</b> | 0.33    |
| $E_{r\theta}$      | 0.0033       | 0.30       | -0.00044                | 0.088        | 0.19    |
| $E_{z\theta}$      | -0.0064      | 0.14       | -0.000094               | 0.77         | 0.0060  |
| $E_{rz}$           | 0.0037       | 0.60       | -0.00039                | 0.48         | 0.037   |
| $E_{max}$          | 0.18         | 0.0052     | 0.00061                 | 0.89         | 0.0015  |
| $\Gamma_{max}$     | 0.11         | 0.00090    | 0.00057                 | 0.78         | 0.0056  |

**S5 Comparison of after-lysis and follow-up strains**

Supplemental Table S20: Linear regression analysis comparing the after-lysis strain to the follow-up strain. Also shown are  $p$ -values and associated  $R^2$  value (Strain n = 16, 15 patients).

|                    | Strain at 0 |            | Change in<br>follow-up<br>strain per 1<br>after-lysis |               | $R^2$  |
|--------------------|-------------|------------|-------------------------------------------------------|---------------|--------|
|                    | strain      | $p$ -value | strain                                                | $p$ -value    |        |
| $E_{zz}$           | 0.15        | 0.037      | -1.42                                                 | 0.71          | 0.010  |
| $E_{rr}$           | -0.0005     | 0.90       | -0.33                                                 | 0.75          | 0.0073 |
| $E_{\theta\theta}$ | -0.0023     | 0.72       | 0.33                                                  | 0.53          | 0.028  |
| $E_{r\theta}$      | 0.0045      | 0.21       | 0.13                                                  | 0.79          | 0.0049 |
| $E_{z\theta}$      | -0.0074     | 0.032      | -1.67                                                 | <b>0.0068</b> | 0.42   |
| $E_{rz}$           | 0.0050      | 0.47       | 0.21                                                  | 0.87          | 0.0021 |
| $E_{max}$          | 0.21        | 0.017      | -1.62                                                 | 0.57          | 0.024  |
| $\Gamma_{max}$     | 0.13        | 0.0046     | -1.48                                                 | 0.42          | 0.046  |

Supplemental Table S21: Linear regression analysis comparing the strain after-lysis to the MD change from suturelysis to follow-up. Also shown are  $p$ -values and associated  $R^2$  value (Strain n = 16, 15 patients, LC Depth n = 15, 14 patients).

|                    | MD at 0 |            | Change in MD per 1 after-lysis |            | $R^2$    |
|--------------------|---------|------------|--------------------------------|------------|----------|
|                    | strain  | $p$ -value | strain                         | $p$ -value |          |
| <i>LC Depth</i>    | -1.20   | 0.24       | 0.18                           | 0.21       | 0.11     |
| $E_{zz}$           | -1.49   | 0.25       | 36.18                          | 0.61       | 0.019    |
| $E_{rr}$           | -0.63   | 0.59       | 260.70                         | 0.39       | 0.053    |
| $E_{\theta\theta}$ | -1.20   | 0.26       | -54.38                         | 0.53       | 0.029    |
| $E_{r\theta}$      | -0.65   | 0.52       | -238.72                        | 0.12       | 0.16     |
| $E_{z\theta}$      | -1.05   | 0.32       | 75.58                          | 0.67       | 0.013    |
| $E_{rz}$           | -1.11   | 0.30       | 17.57                          | 0.93       | 0.00060  |
| $E_{max}$          | -1.09   | 0.50       | -1.21                          | 0.98       | 0.000035 |
| $\Gamma_{max}$     | -0.58   | 0.73       | -31.19                         | 0.68       | 0.012    |
